# Supplementary material for: Health Literacy and Preventive Behaviors Modify the Association between Pre-Existing Health Conditions and Suspected COVID-19 Symptoms: A Multi-Institutional Survey
Source: Int J Environ Res Public Health. 2020 Nov 19;17(22):8598. doi: 10.3390/ijerph17228598 (PMC7699410; doi:10.3390/ijerph17228598)
Supplement: Supplementary file 1 [file ijerph-17-08598-s001.pdf]

**Table 1.** Association between Socio-demographic Characteristics and Having S-Covid-19-S in Studied Participants via Logistic Regression ( $N = 8291$ ).

| Variables                         | Have S-Covid-19-S <sup>†</sup> |          |
|-----------------------------------|--------------------------------|----------|
|                                   | OR (95% CI)                    | <i>p</i> |
| Age, year                         |                                |          |
| 18–39                             | 1.00                           |          |
| 40–59                             | 1.67 (1.50, 1.85)              | <0.001   |
| 60–85                             | 3.03 (2.70, 3.40)              | <0.001   |
| Gender                            |                                |          |
| Women                             | 1.00                           |          |
| Men                               | 1.01 (0.92, 1.10)              | 0.837    |
| Marital status                    |                                |          |
| Never married                     | 1.00                           |          |
| Ever married                      | 2.05 (1.81, 2.31)              | <0.001   |
| Education attainment              |                                |          |
| Junior high school or below       | 1.00                           |          |
| Senior high school                | 0.86 (0.76, 0.97)              | 0.015    |
| College/university or higher      | 0.99 (0.89, 1.10)              | 0.884    |
| Occupation                        |                                |          |
| Employed                          | 1.00                           |          |
| Own business                      | 0.99 (0.88, 1.10)              | 0.808    |
| Others                            | 0.85 (0.76, 0.95)              | 0.005    |
| Ability to pay for medication     |                                |          |
| Very or fairly difficult          | 1.00                           |          |
| Very or fairly easy               | 0.50 (0.46, 0.55)              | <0.001   |
| Social status                     |                                |          |
| Low                               | 1.00                           |          |
| Middle or high                    | 0.80 (0.71, 0.90)              | <0.001   |
| BMI, kg/m <sup>2</sup>            |                                |          |
| Underweight (BMI < 18.5)          | 0.94 (0.81, 1.10)              | 0.441    |
| Normal weight (18.5 ≤ BMI < 25.0) | 1.00                           |          |
| Overweight/obese (BMI ≥ 25.0)     | 0.85 (0.74, 0.98)              | 0.022    |

Abbreviations: OR, odds ratio; CI, confidence interval; S-COVID-19-S, suspected corona virus disease-2019 symptoms; BMI, body mass index. <sup>†</sup> Suspected COVID-19 symptoms including fever, cough, dyspnea, myalgia, fatigue, sputum production, confusion, headache, sore throat, rhinorrhea, chest pain, hemoptysis, diarrhea, and nausea/vomiting.

**Table 2.** Spearman Correlation among Covariates ( $N=8291$ ).

|                 | <b>Age</b> | <b>Gender</b> | <b>Marital status</b> | <b>Education</b> | <b>Occupation</b> | <b>Ability to pay</b> | <b>Social status</b> |
|-----------------|------------|---------------|-----------------------|------------------|-------------------|-----------------------|----------------------|
| Gender          | 0.04       |               |                       |                  |                   |                       |                      |
| Marital status  | 0.38       | -0.06         |                       |                  |                   |                       |                      |
| Education       | -0.41      | 0.04          | -0.27                 |                  |                   |                       |                      |
| Occupation      | 0.10       | -0.07         | -0.16                 | -0.26            |                   |                       |                      |
| Ability to pay  | -0.17      | -0.01         | -0.08                 | 0.19             | -0.17             |                       |                      |
| Social status   | -0.10      | 0.02          | -0.01                 | 0.21             | -0.14             | 0.29                  |                      |
| Body mass index | 0.05       | 0.06          | 0.13                  | -0.01            | -0.08             | 0.03                  | 0.04                 |
